# Supplementary material
Source: MDPI journal article supplement (https://www.mdpi.com/search?q=medicina-55-00017)
Supplement: s001 [file medicina-55-00017-s001.pdf]

Table S1: List of 181 Genes screenen.

ABCC9, ACADVL, ACTA1, ACTC1, ACTN2, AKAP9, ALG10, AMPD1, ANK2, ANO5, B3GALNT2, B4GAT1, BAG3, BIN1, BMPR2, CACNA1C, CACNA1D, CACNA2D1, CACNB2, CALM1, CALM2, CALR3, CAPN3, CASQ2, CAV3, CCDC78, CFL2, CHKB, CLIC2, CNBP, CNTN1, COL12A1, COL6A1, COL6A2, COL6A3, COL9A3, CRYAB, CSRP3, CTNNA3, DAG1, DES, DMD, DMPK, DNAJB6, DNAJC19, DNM2, DPP6, DSC2, DSG2, DSP, DTNA, DYSF, EMD, EYA4, FHL1, FKRP, FKTN, FLNC, GATAD1, GJA1, GJA5, GLA, GMPPB, GNAI2, GNE, GPD1L, HCN4, HNRNPDL, HRAS, ISCU, ISPD, ITGA7, JPH2, JUP, KBTBD13, KCNA5, KCND3, KCNE1, KCNE2, KCNE3, KCNH2, KCNJ2, KCNJ5, KCNQ1, KLHL40, KLHL41, LAMA2, LAMA4, LAMP2, LARGE, LDB3, LMNA, LMOD3, MEGF10, MIB1, MTM1, MYBPC1, MYBPC3, MYF6, MYH2, MYH6, MYH7, MYL2, MYL3, MYLK2, MYOT, MYOZ2, MYPN, NEB, NEXN, NKX2-5, NPPA, NUP155, PABPN1, PKP2, PLEC, PLN, PNPLA2, POLG, POMGNT1, POMGNT2, POMK, POMT1, POMT2, PRDM16, PRKAG2, PSEN1, PSEN2, PTRF, RAF1, RBM20, RRM2B, RYR1, RYR2, SCN10A, SCN1B, SCN2B, SCN3B, SCN4B, SCN5A, SCO2, SDHA, SEPN1, SGCA, SGCB, SGCD, SGCG, SLC22A5, SLC25A4, SMCHD1, SNTA1, SPEG, STAC3, SYNE1, SYNE2, TAZ, TBX20, TCAP, TGFB3, TIA1, TMEM43, TMEM5, TMPO, TNNC1, TNNI2, TNNI3, TNNT1, TNNT2, TNPO3, TPM1, TPM2, TPM3, TRAPPC11, TRDN, TRIM32, TRPM4, TTN, TTR, VCL, VCP, VMA21.
